# Supplementary material
Source: PubMed Central journal article supplement (PMC3386800)

## Supporting information

**Table S1**

List of the detected neutral oligosaccharides (unreduced neutral mass) from Jersey sample 1230. Abbreviations: expt: experimental, cal: calibrated, RT: retention time (minutes).

<sup>1</sup>Hex, Hexose; HexNAc, *N*-acetylhexosamine. <sup>2</sup>expt: Experimental mass values have been averaged.

<sup>3</sup> Oligosaccharide is not detected in sample 1230, but it is present in other milk samples.

| OS ID | Neutral mass      |          |       | Oligosaccharides <sup>1</sup> |        |        | RT    | Abundance |
|-------|-------------------|----------|-------|-------------------------------|--------|--------|-------|-----------|
|       | expt <sup>2</sup> | Cal      | delta | Hex                           | HexNAc | Fucose |       |           |
| 1     | 504.169           | 504.169  | 0.860 | 3                             |        |        | 9.03  | 4798365   |
| 1     | 504.169           | 504.169  | 0.463 | 3                             |        |        | 11.14 | 2289054   |
| 1     | 504.169           | 504.169  | 0.298 | 3                             |        |        | 12.43 | 10735273  |
| 1     | 504.168           | 504.169  | 1.785 | 3                             |        |        | 14.24 | 2925245   |
| 2     | 545.195           | 545.196  | 1.022 | 2                             | 1      |        | 11.54 | 12303374  |
| 5     | 666.221           | 666.222  | 1.261 | 4                             |        |        | 11.02 | 119885    |
| 8     | 707.247           | 707.248  | 1.697 | 3                             | 1      |        | 12.34 | 11536     |
| 8     | 707.248           | 707.248  | 1.273 | 3                             | 1      |        | 13.82 | 801323    |
| 8     | 707.248           | 707.248  | 1.273 | 3                             | 1      |        | 15.04 | 1155341   |
| 8     | 707.247           | 707.248  | 2.192 | 3                             | 1      |        | 17.77 | 120617    |
| 9     | 748.273           | 748.275  | 2.539 | 2                             | 2      |        | 10.53 | 11621     |
| 9     | 748.274           | 748.275  | 2.005 | 2                             | 2      |        | 14.25 | 291627    |
| 9     | 748.274           | 748.275  | 1.604 | 2                             | 2      |        | 16.20 | 66392     |
| 14    | 869.300           | 869.301  | 1.898 | 4                             | 1      |        | 17.46 | 3715431   |
| 15    | 910.327           | 910.328  | 1.318 | 3                             | 2      |        | 14.06 | 21244     |
| 15    | 910.328           | 910.328  | 0.275 | 3                             | 2      |        | 15.82 | 2563958   |
| 18    | 990.327           | 990.327  | 0.942 | 6                             |        |        | 11.81 | 101203    |
| 18    | 990.326           | 990.327  | 1.868 | 6                             |        |        | 14.51 | 71083     |
| 21    | 1072.380          | 1072.381 | 0.187 | 4                             | 2      |        | 18.51 | 814672    |
| 22    | 1113.408          | 1113.407 | 0.943 | 3                             | 3      |        | 17.22 | 336513    |
| 23    | 1152.381          | 1152.380 | 0.477 | 7                             |        |        | 15.57 | 24633     |
| 26    | n/a <sup>3</sup>  | 1234.433 | 2.592 | 5                             | 2      |        | n/a   | n/a       |
| 28    | n/a <sup>3</sup>  | 1275.460 | 0.157 | 4                             | 3      |        | n/a   | n/a       |
| 29    | 1316.484          | 1316.487 | 1.975 | 3                             | 4      |        | 18.54 | 10383     |
| 32    | n/a <sup>3</sup>  | 1396.486 | n/a   | 6                             | 2      |        | n/a   | n/a       |
| 36    | n/a <sup>3</sup>  | 1462.545 | n/a   | 3                             | 4      | 1      | n/a   | n/a       |
| 37    | n/a <sup>3</sup>  | 1478.539 | n/a   | 4                             | 4      |        | n/a   | n/a       |
| 38    | 1519.563          | 1519.566 | 2.106 | 3                             | 5      |        | 13.54 | 4659      |
| 42    | 1624.597          | 1624.597 | 0.123 | 4                             | 4      | 1      | 16.10 | 17353     |
| 43    | 1640.590          | 1640.592 | 1.585 | 5                             | 4      |        | 14.79 | 7325      |
| 45    | n/a <sup>3</sup>  | 1681.619 | n/a   | 4                             | 5      |        | n/a   | n/a       |
| 46    | 1722.642          | 1722.645 | 1.974 | 3                             | 6      |        | 14.81 | 10328     |
| 47    | 1786.653          | 1786.650 | 1.455 | 5                             | 4      | 1      | 16.46 | 43540     |
| 49    | 1827.678          | 1827.677 | 0.821 | 4                             | 5      | 1      | 17.54 | 22882     |
| 52    | 1868.704          | 1868.703 | 0.428 | 3                             | 6      | 1      | 17.50 | 169536    |

**Table S2**

List of the detected acidic oligosaccharides (unreduced neutral mass) from Jersey sample 1230. Abbreviations: expt: experimental, cal: calibrated, RT: retention time (minutes).

<sup>1</sup>Hex, Hexose; HexNAc, *N*-acetylhexosamine; NeuAc, *N*-acetyl neuraminic acid; NeuGc, *N*-glycolyl neuraminic acid. <sup>2</sup>expt: Experimental mass values have been averaged. <sup>3</sup>Oligosaccharide is not detected in sample 1230, but it is present in other milk samples.

| OS ID | Neutral mass      |          |             | Oligosaccharides <sup>1</sup> |        |       |       | RT    | Abundance |
|-------|-------------------|----------|-------------|-------------------------------|--------|-------|-------|-------|-----------|
|       | expt <sup>2</sup> | Cal      | delta (ppm) | Hex                           | HexNAc | NeuAc | NeuGc |       |           |
| 3     | 633.211           | 633.212  | 1.369       | 2                             |        | 1     |       | 15.96 | 7764487   |
| 3     | 633.210           | 633.212  | 2.000       | 2                             |        | 1     |       | 21.58 | 16195508  |
| 4     | n/a <sup>3</sup>  | 649.206  | n/a         | 2                             |        |       | 1     | n/a   | n/a       |
| 6     | n/a <sup>3</sup>  | 674.238  | n/a         | 1                             | 1      | 1     |       | n/a   | n/a       |
| 7     | n/a <sup>3</sup>  | 690.233  | n/a         | 1                             | 1      |       | 1     | n/a   | n/a       |
| 7     | n/a <sup>3</sup>  | 690.233  | n/a         | 1                             | 1      |       | 1     | n/a   | n/a       |
| 10    | 795.264           | 795.264  | 0.503       | 3                             |        | 1     |       | 16.70 | 13683     |
| 10    | 795.263           | 795.264  | 1.886       | 3                             |        | 1     |       | 23.49 | 1331060   |
| 12    | 836.290           | 836.291  | 0.957       | 2                             | 1      | 1     |       | 15.31 | 20175     |
| 19    | n/a <sup>3</sup>  | 998.344  | n/a         | 3                             | 1      | 1     |       | n/a   | n/a       |
| 24    | 1160.395          | 1160.397 | 1.724       | 4                             | 1      | 1     |       | 24.96 | 472111    |
| 25    | 1201.426          | 1201.423 | 2.580       | 3                             | 2      | 1     |       | 24.59 | 11694     |
| 39    | n/a <sup>3</sup>  | 1525.529 | 1.901       | 5                             | 2      | 1     |       | n/a   | n/a       |

**Figure S1:** (A) MALDI FTICR tandem MS of (A) ion at  $m/z$  1891.748 (corresponding to 1868.70 in HPLC Chip/TOF MS) and (B) ion at  $m/z$  1809.63 (corresponding to 1786.65 in HPLC Chip/TOF MS).

**A**

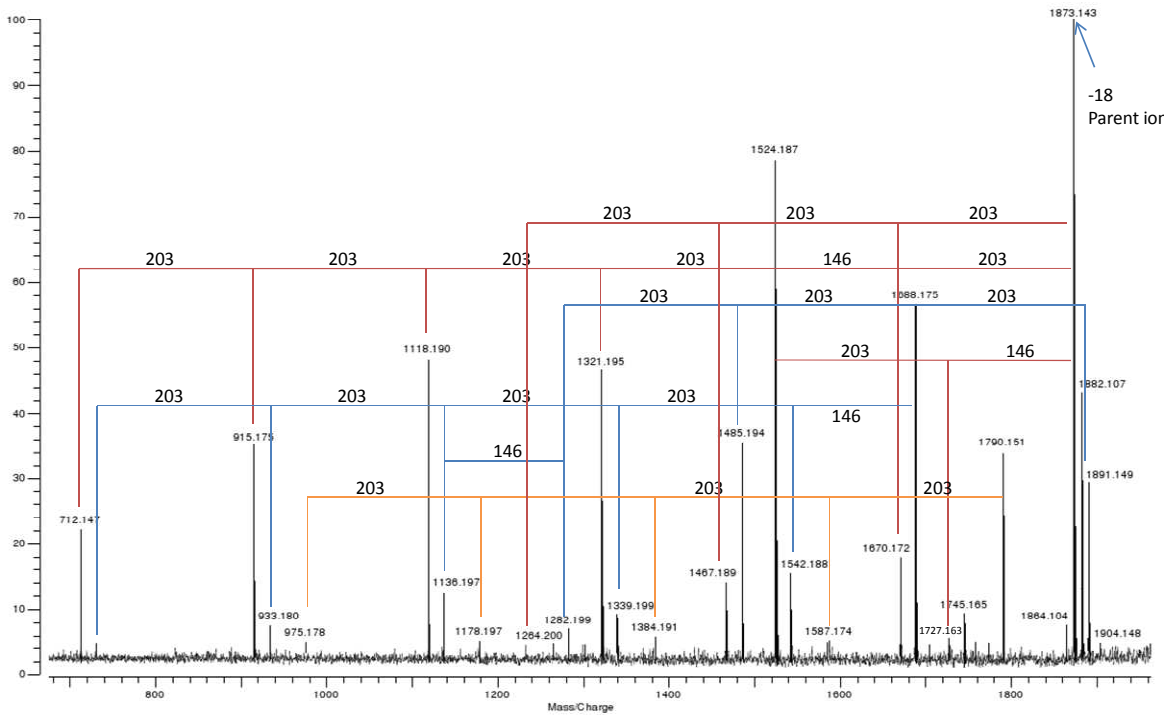

**B**

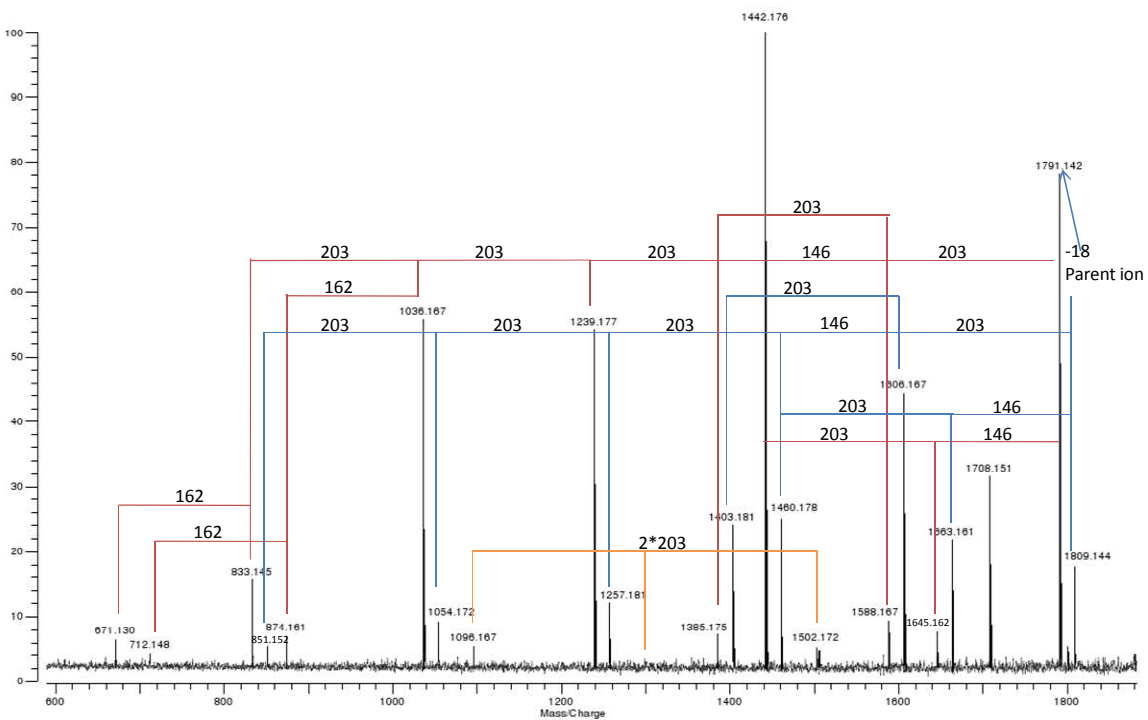

Supplement: NIHMS383243-supplement-1_si_001.pdf [file NIHMS383243-supplement-1_si_001.pdf]
